# Supplementary material for: Exploring the Willingness to Accept SARS-CoV-2 Vaccine in a University Population in Southern Italy, September to November 2020
Source: MDPI journal article supplement (doi:10.3390/vaccines9030275), 2021-03-18
Supplement: s1 [file s1]

## **A. SOCIO-DEMOGRAPHIC, PROFESSIONAL AND ANAMNESTIC CHARACTERISTICS**

*The questions in this section are aimed to acquire information on your socio-demographic, professional and anamnestic characteristics*

**A1. Year of birth** \_\_\_\_\_

**A2. Gender** ☐ Male ☐ Female

**A3. What is your present marital status?** ☐ Married ☐ Cohabitant ☐ Unmarried ☐ Other \_\_\_\_\_

**A4. What is the highest education leaving certificate, diploma or education degree you have obtained?**

☐ None ☐ Primary ☐ Lower secondary ☐ Upper secondary ☐ Higher

**A5. What is your professional role?**

☐ Faculty Member ☐ Student (Degree and year of course) \_\_\_\_\_

☐ Administrative staff ☐ Other \_\_\_\_\_

**A6. What is your current working area?** \_\_\_\_\_

**A7. Do you have any chronic disease?** ☐ No ☐ Yes, which one?

| Chronic disease | How old were you when it was first diagnosed | Chronic disease | How old were you when it was first diagnosed |
|-----------------|----------------------------------------------|-----------------|----------------------------------------------|
|                 |                                              |                 |                                              |
|                 |                                              |                 |                                              |

**A8. Have you been tested positive for COVID-19?** ☐ No ☐ Yes

**A9. Have you been in close contact to anyone who has been tested positive for COVID-19?**

☐ No (go to A.10) ☐ Yes (more than one is allowed)

☐ Household/cohabitant ☐ Relative not cohabitant ☐ Co-worker ☐ Friend ☐ Acquaintance ☐ Neighbour

**A10. Have you experienced in the last ten months, any of the following symptoms?** (more than one is allowed)

☐ None ☐ Headache ☐ Head or muscle aches ☐ Fever ☐ Cough ☐ Tiredness ☐ Sore throat ☐ Conjunctivitis

☐ Dyspnea ☐ Nausea/Vomiting ☐ Diarrhea ☐ New loss of taste ☐ New loss of smell

## **B. ATTITUDES REGARDING COVID-19**

*The questions in this section are aimed at acquiring information about your attitudes regarding COVID-19*

**B1. How do you perceive your risk of developing COVID-19, on a 1 to 10 scale where 1 indicates low risk and 10 indicates high risk?** (only if you have not been tested positive)

1 2 3 4 5 6 7 8 9 10

**B2. For each statement answer whether you agree, are uncertain, or disagree**

|                                                    | Strongly disagree | Disagree | Uncertain | Agree | Strongly agree |
|----------------------------------------------------|-------------------|----------|-----------|-------|----------------|
| It is important to get vaccinated against COVID-19 |                   |          |           |       |                |
| COVID-19 is a serious disease                      |                   |          |           |       |                |
| I trust in the information received about COVID-19 |                   |          |           |       |                |

**B3. For each statement answer whether or not are you concerned**

|                                         | Extremely | Somewhat | Moderately | Slightly | Not at all |
|-----------------------------------------|-----------|----------|------------|----------|------------|
| COVID-19 vaccine might not be safe      |           |          |            |          |            |
| COVID-19 vaccine might not be effective |           |          |            |          |            |

**B4. Are you planning to have yourself vaccinated against COVID-19?** (answer only if you have not contracted it)

☐ Yes (more than one reason is allowed)

☐ No (more than one reason is allowed)

| REASONS                                                      | REASONS                                                              |
|--------------------------------------------------------------|----------------------------------------------------------------------|
| <input type="checkbox"/> If the vaccine is free of charge    | <input type="checkbox"/> If the vaccine is not free of charge        |
| <input type="checkbox"/> If physician recommends the vaccine | <input type="checkbox"/> If physician does not recommend the vaccine |
| <input type="checkbox"/> COVID-19 is a severe disease        | <input type="checkbox"/> COVID-19 is not a severe disease            |
| <input type="checkbox"/> Vaccine is safe                     | <input type="checkbox"/> Vaccine is not safe                         |
| <input type="checkbox"/> Vaccine is effective                | <input type="checkbox"/> Vaccine is not effective                    |
| <input type="checkbox"/> I feel at risk                      | <input type="checkbox"/> I do not feel at risk                       |
| <input type="checkbox"/> Other reasons _____                 | <input type="checkbox"/> Other reasons _____                         |

### **C. ATTITUDE AND BEHAVIOR REGARDING INFLUENZA VACCINATION**

*The questions in this section are aimed at exploring your attitude and behavior regarding influenza vaccination*

**C1. Have you received the vaccination against seasonal influenza last year?** ☐ No ☐ Yes

**C2. Are you planning to have yourself vaccinated against seasonal influenza?** (answer only if you have not received it)

☐ Yes (more than one reason is allowed)

☐ No (more than one reason is allowed)

| REASONS                                                                                  | REASONS                                                              |
|------------------------------------------------------------------------------------------|----------------------------------------------------------------------|
| <input type="checkbox"/> If the vaccine is free of charge                                | <input type="checkbox"/> If the vaccine is not free of charge        |
| <input type="checkbox"/> If physician recommends the vaccine                             | <input type="checkbox"/> If physician does not recommend the vaccine |
| <input type="checkbox"/> Seasonal influenza is a severe disease                          | <input type="checkbox"/> Seasonal influenza is not a severe disease  |
| <input type="checkbox"/> Vaccine is safe                                                 | <input type="checkbox"/> Vaccine is not safe                         |
| <input type="checkbox"/> Vaccine is effective                                            | <input type="checkbox"/> Vaccine is not effective                    |
| <input type="checkbox"/> I feel at risk                                                  | <input type="checkbox"/> I do not feel at risk                       |
| <input type="checkbox"/> Symptoms of COVID-19 and seasonal influenza can be very similar | <input type="checkbox"/> Other reasons _____                         |
| <input type="checkbox"/> Other reasons _____                                             |                                                                      |

### **D. INFORMATION**

*The questions in this section are aimed to evaluate the sources from which you acquire information on COVID-19 vaccination*

**D1. From which of the following sources do you receive information about COVID-19 vaccination?** (more than one answer is allowed)

☐ None ☐ Internet ☐ Mass media ☐ Scientific journals ☐ Meetings/Conferences

**D2. Do you feel you need more information about COVID-19 vaccination?** ☐ No ☐ Yes
